# Supplementary material for: Evaluation of MITgcm-based ocean reanalyses for the Southern Ocean
Source: Copernicus journal article supplement (doi:10.5194/gmd-17-8613-2024), 2024-12-05
Supplement: Supplementary file 1 [file gmd-17-8613-2024-supplement.pdf]

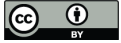

*Supplement of*

## **Evaluation of MITgcm-based ocean reanalyses for the Southern Ocean**

**Yoshihiro Nakayama et al.**

*Correspondence to:* Yoshihiro Nakayama ([yoshihiro.nakayama@lowtem.hokudai.ac.jp](mailto:yoshihiro.nakayama@lowtem.hokudai.ac.jp))

The copyright of individual parts of the supplement might differ from the article licence.

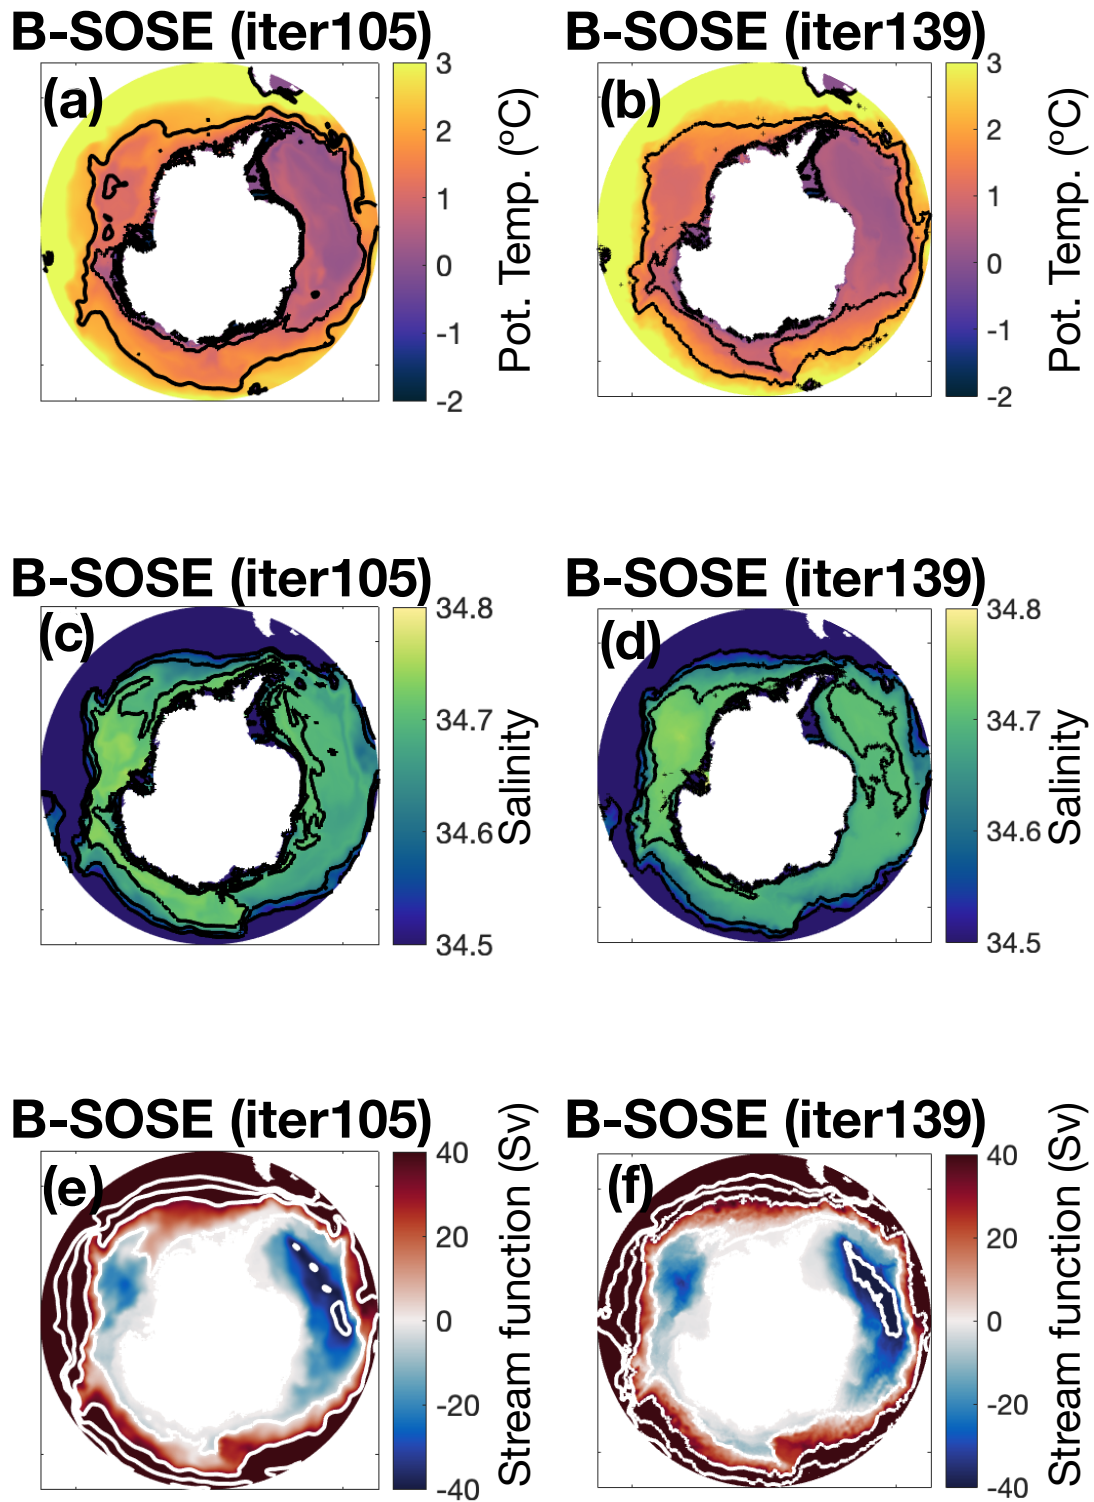

8

9 **Figure S1.** Same as Fig. 4 but for SOSE iterations 105 and 139.

10

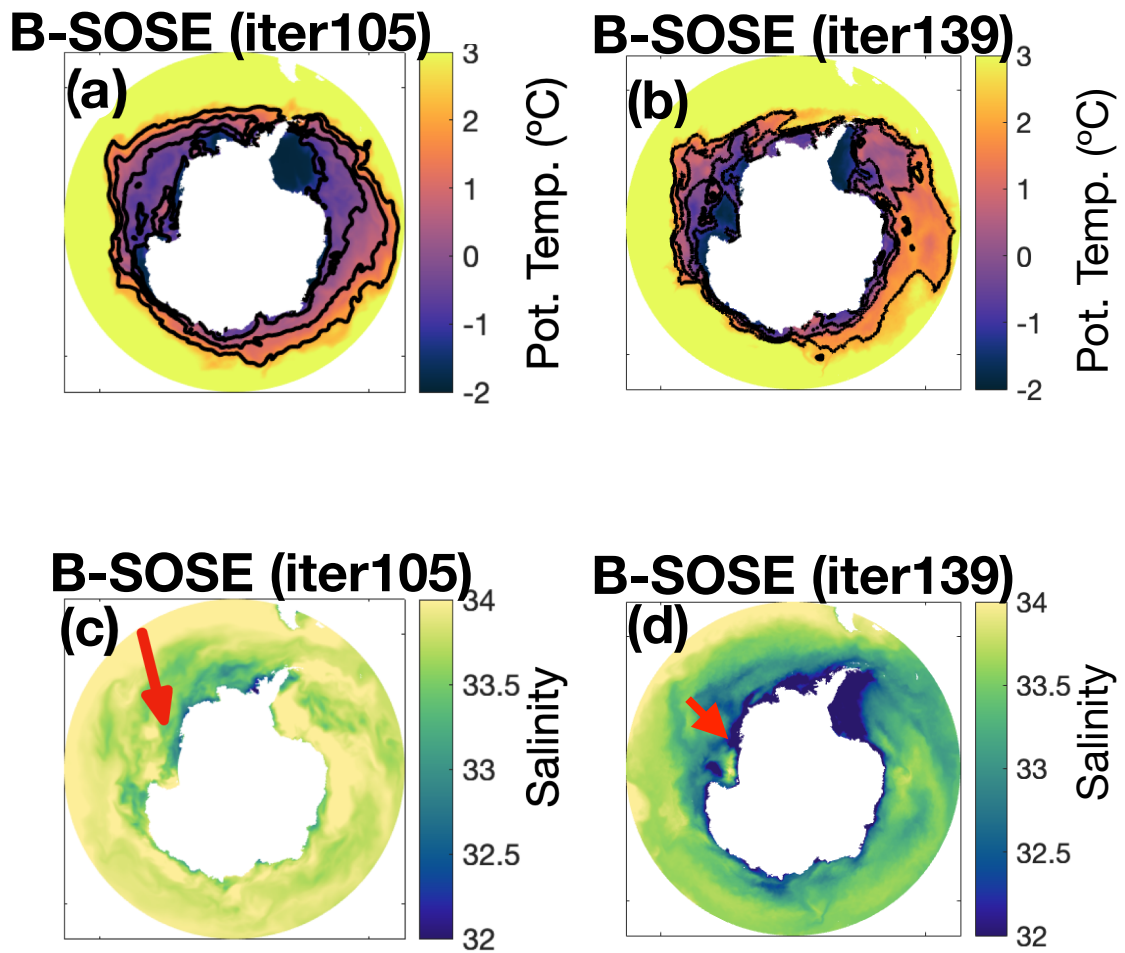

11

12 **Figure S2.** Same as Fig. 5 but for SOSE iterations 105 and 139.

13

14

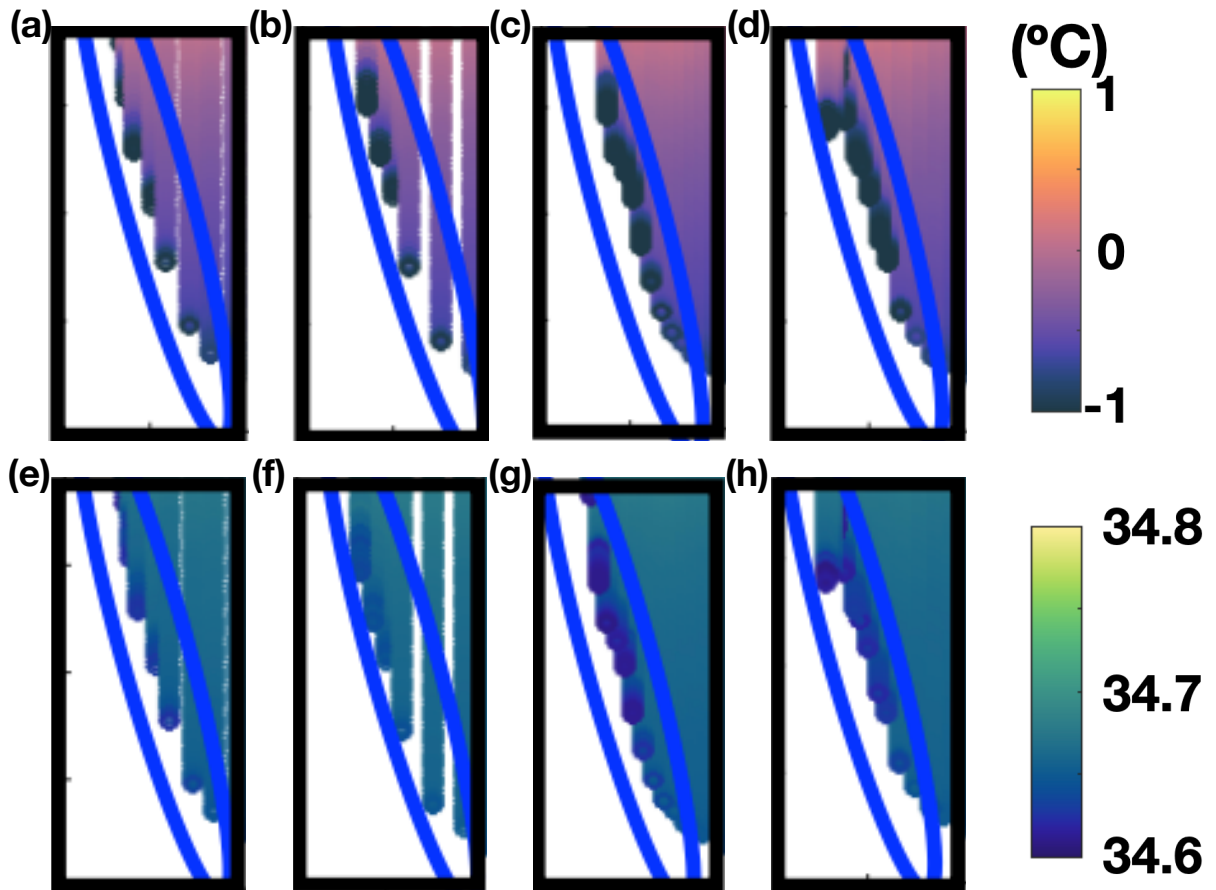

15

16

17 **Figure S3.** Close-ups of Figs. 12i and 13i for the shelf break regions showing the downslope

18 descent of dense shelf water and formation of AABW.

19

20

21

22

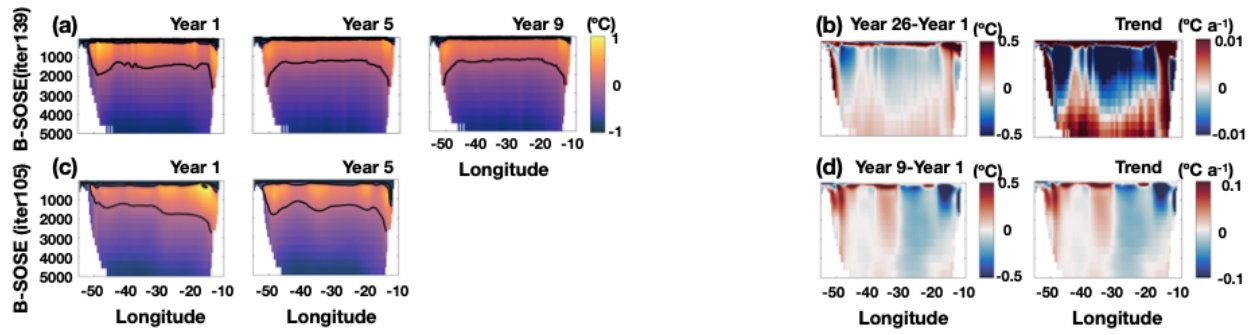

23

24 **Figure S4.** Same as Fig. 12 but for SOSE iterations 105 and 139. Note that the color scale for  
 25 SOSE iteration 105 trends is different from that of the other figures in Fig. 12.

26

27

28

29

30

31

32

33

34

35

36

37

38

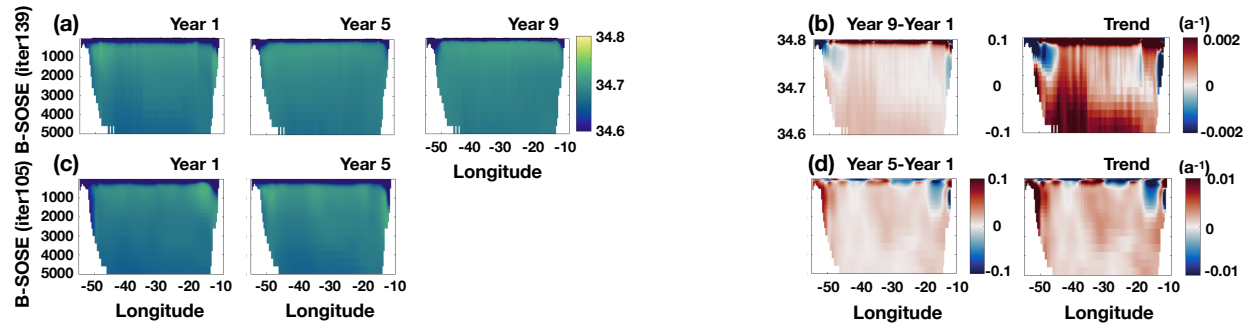

39

40 **Figure S5.** Same as Fig. 13 but for SOSE iterations 105 and 139. Note that the color scale for

41 SOSE iteration 105 trends is different compared to other figures in Fig. 13.

42

43

44

45

46

47

48

49

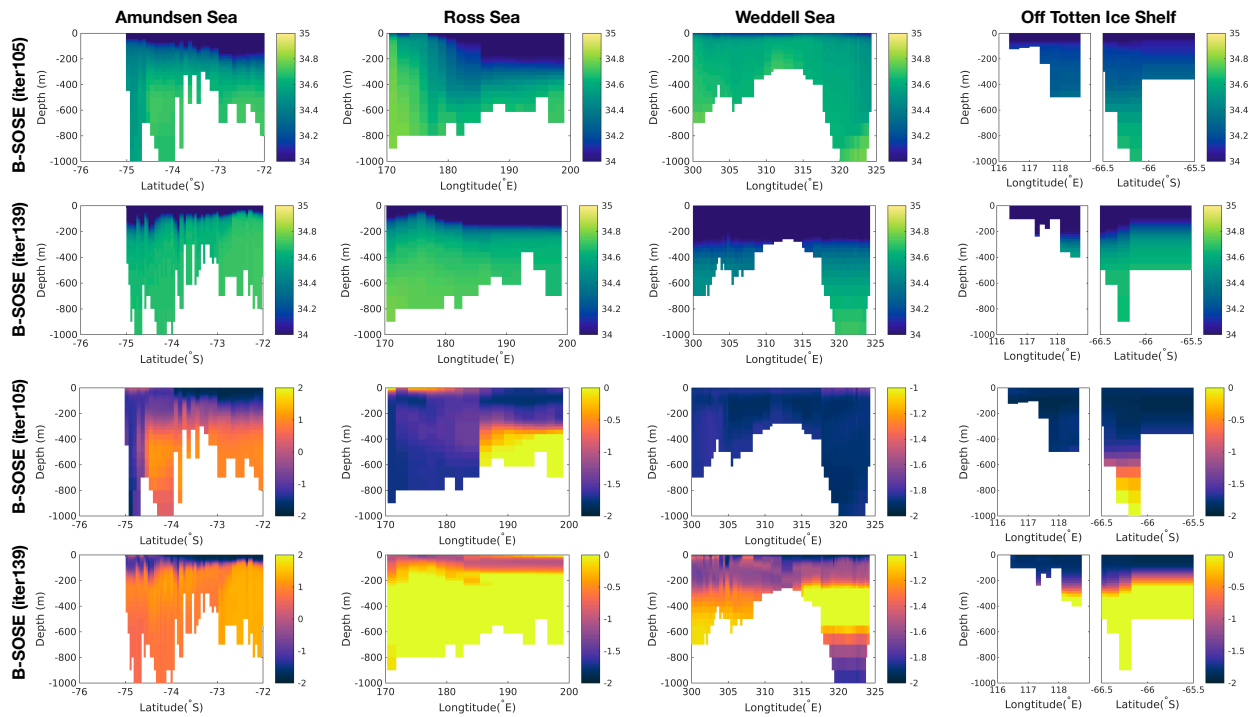

50

51 **Figure S6.** Comparisons between SOSE iterations 105 and 139 for all temperature and salinity  
 52 sections shown in Figures 18 and 19
